# Supplementary material for: Interventions addressing the adolescent HIV continuum of care in South Africa: a systematic review and modified Delphi analysis
Source: HighWire-hosted journal article supplement (doi:10.1136/bmjopen-2021-057797), 2022-04-01
Supplement: bmjopen-2021-057797supp001_data_supplement.pdf [file bmjopen-2021-057797supp001_data_supplement.pdf]

Supplement 1: Search terms used for systematic review:

Pubmed search strategy:

((adolescent[MeSH Terms]) OR (teen\*) OR (youth\*) OR (adoles\*)) AND ((HIV infection[MeSH Terms]) OR (acquired immune deficiency syndrome[MeSH Terms]) OR (HIV[TIAB]) OR ("AIDS"[TIAB]) OR ("acquired immune deficiency syndrome"[TIAB]) OR ("acquired immunodeficiency syndrome"[TIAB])) AND ("south africa"[TIAB]) AND ((intervention[TIAB])

Google scholar search strategy:

"adolescen\* HIV intervention South Africa"

ScienceDirect search strategy:

Key words: "Adolescent HIV intervention South Africa"
