# Supplementary material for: Interventions addressing the adolescent HIV continuum of care in South Africa: a systematic review and modified Delphi analysis
Source: HighWire-hosted journal article supplement (doi:10.1136/bmjopen-2021-057797), 2022-04-01
Supplement: bmjopen-2021-057797supp004_data_supplement.pdf [file bmjopen-2021-057797supp004_data_supplement.pdf]

**Supplement 4:** Interventions to improve the continuum of care for adolescents and young adults living with HIV in South Africa

| Authors                       | Title                                                                                                                           | Publication and Date          | Location                                                              | Number of Subjects          | Ages (Target Population)   | Study Type                                                | Intervention Description                                                                                                                                                                                                                                                                                                | Overall Results                                                                                                                                                                                                                                  | Median Overall Score Round 1 |
|-------------------------------|---------------------------------------------------------------------------------------------------------------------------------|-------------------------------|-----------------------------------------------------------------------|-----------------------------|----------------------------|-----------------------------------------------------------|-------------------------------------------------------------------------------------------------------------------------------------------------------------------------------------------------------------------------------------------------------------------------------------------------------------------------|--------------------------------------------------------------------------------------------------------------------------------------------------------------------------------------------------------------------------------------------------|------------------------------|
| <b>Adolescent HIV Testing</b> |                                                                                                                                 |                               |                                                                       |                             |                            |                                                           |                                                                                                                                                                                                                                                                                                                         |                                                                                                                                                                                                                                                  |                              |
| Doherty, et al.               | Effect of Home-Based HIV Counseling and Testing Intervention in Rural South Africa: Cluster Randomised Trial                    | <i>BMJ</i> 2013               | uMzimkhulu subdistrict, KwaZulu-Natal, South Africa                   | 4154 Adolescents and Adults | 14-17, 18+ Adult Guardians | Cluster Randomized Controlled Trial; Door-to-Door Testing | Door-to-door home-based HIV testing (HBT) performed by lay counselors compared to standard of care HIV counseling and testing at local clinics.                                                                                                                                                                         | Testing completed in 69% of HBT compared to 47% in control (PR 1.54 95% CI 1.32 to 1.81)                                                                                                                                                         | 72.5                         |
| Rotheram-Borus, et al.        | Feasibility of Using Soccer and Job Training to Prevent Drug Abuse and HIV                                                      | <i>AIDS and Behavior</i> 2016 | South Africa                                                          | 142 Adolescents             | 18-25 Unemployed Males     | Community Randomized Controlled Trial                     | Randomized neighborhoods to immediate intervention or delayed control; Intervention: Grassroot Soccer program with trained coaches, random rapid diagnostic tests for alcohol/drugs, and vocational training.                                                                                                           | 29% testing in immediate vs. 24% in delayed (no significant difference)                                                                                                                                                                          | 50                           |
| Hershow, et al.               | Using Soccer to Build Confidence and Increase HCT Uptake Among Adolescent Girls                                                 | <i>Sport in Society</i> 2015  | South Africa                                                          | 1953 Adolescents            | 12-16 (Females Only)       | Pre-Post Evaluation                                       | Survey before and after participation in SKILLZ Street intervention developed by Grassroot Soccer (GRS). SKILLZ Street female coaches delivered an afterschool education program consisting of 10, two hour bi-weekly sessions.                                                                                         | 69% tested for HIV<br>No control group.                                                                                                                                                                                                          | 63                           |
| Shanaube, et al.              | Community Intervention Improves Knowledge of HIV Status of Adolescents in Zambia: Findings from HPTN 071-PopART for Youth Study | <i>AIDS</i> 2017              | Results from Zambia only; Intervention also conducted in South Africa | 11 175 Adolescents          | 15-19                      | Community-Randomized Clinical Trial                       | <b>HPTN 071 (PopART)</b><br>Door-to-door HIV prevention package delivered by community health workers. Intervention included in-home HIV Counseling and Testing (HCT), support for linkage to care for individuals identified living with HIV, ART adherence support, referrals for voluntary medical male circumcision | HCT uptake 80% (8,707/10,809) and awareness of an HIV-positive status tripled from 75 to 210. Home visits from providers saw the percentage of ALWH aware of their HIV status rise from 27.6% to 88.5%.<br><br>No comparison with standard care. | 76                           |

|                          |                                                                                                                                                                                                                                   |                                |                             |                                         |         |                             |                                                                                                                                                                                                                                                                                                                                                                                                           |                                                                                                                                                                                                                                                                                                                                                                                                                                                             |      |
|--------------------------|-----------------------------------------------------------------------------------------------------------------------------------------------------------------------------------------------------------------------------------|--------------------------------|-----------------------------|-----------------------------------------|---------|-----------------------------|-----------------------------------------------------------------------------------------------------------------------------------------------------------------------------------------------------------------------------------------------------------------------------------------------------------------------------------------------------------------------------------------------------------|-------------------------------------------------------------------------------------------------------------------------------------------------------------------------------------------------------------------------------------------------------------------------------------------------------------------------------------------------------------------------------------------------------------------------------------------------------------|------|
| Pettifor, et al          | HIVself-testing among young women in rural South Africa: A randomized controlled trial comparing clinic-based HIVtesting to the choice of eitherclinic esting or HIVself-testing with secondary distribution to peers andpartners | <i>EClinical Medicine</i> 2020 | Mpumlanga, SouthAfrica      | 287 women                               | 18 - 26 | Randomized Controlled Trial | Standard of care HIV counseling and testing (HCT) at government clinics vs. choice of clinic based HCT or HIV self-testing kits.<br><br>+referrals for peers to receive clinic based HCT or HIV self-testing kits                                                                                                                                                                                         | 146 randomized to HCT and 141 to choice. In the choice arm 95% (n=135) chose HIV self testing kits. After 3 months a significantly higher percent (92%) of participants in the choice arm reported HIV testing compared to (43%) the HCT arm with a difference of 43% (95% CI 40% - 58%). By 9 months the difference decreased to 25% (95% CI 17% - 33%). Participants in the choice arm were more likely to invite peers or partners to test (94% vs. 76%) | 70   |
| <b>Adherence</b>         |                                                                                                                                                                                                                                   |                                |                             |                                         |         |                             |                                                                                                                                                                                                                                                                                                                                                                                                           |                                                                                                                                                                                                                                                                                                                                                                                                                                                             |      |
| Bhana, et al.            | The VUKA Family Program: Piloting a Family-Based Psychosocial Intervention to Promote Health and Mental Health Among HIV Infected Early Adolescents in South Africa                                                               | <i>AIDS Care</i> Jan 2014      | KwaZulu-Natal, South Africa | 65 Adolescents and Their Family Members | 10-13   | Randomized Controlled Trial | <b>VUKA Family Program</b><br>Inspired by CHAMP, the intervention consisted of 3 months and ten sessions involving a culturally-tailored cartoon storyline and curriculum. The curriculum follows the story and provides step-by-step guidance for problem solving and facilitating discussions. ALWH were assessed for feelings of stigma, knowledge of ART, adherence depression and caregiver support. | ART adherence: Intervention (I) 1.10, Control (C) -. 43 at baseline; Follow-up, $p < .05$ .<br><br>Caregiver/child communication: (I) .41, (C) -.07, $p < .09$ .<br><br>Youth knowledge of HIV treatment: (I) .27; (C) -.74, $p < .08$ .                                                                                                                                                                                                                    | 68.5 |
| Cluver, et al.           | Achieving Equity in HIV-Treatment Outcomes: Can Social Protection Improve Adolescent ART-Adherence in South Africa?                                                                                                               | <i>AIDS Care</i> 2016          | Eastern Cape, South Africa  | 1059 Adolescents                        | 10-19   | Observational Cohort        | Evaluated the provision of social protections on adherence. Social provisions included government cash transfers, food security, school fees/materials, school feeding, and clothing; HIV support group, sports groups, choir/art groups, positive parenting and parental supervision/monitoring.                                                                                                         | Three social protection provisions were associated with reduced non-adherence:<br><br>Food provision (aOR .57, CI .42-.76, $p < .001$ );<br><br>HIV support group attendance (aOR .60, CI .40-.91, $p < .02$ ); High parental/caregiver supervision (aOR .56, CI .43-.73, $p < .001$ ).                                                                                                                                                                     | 75   |
| <b>Retention in Care</b> |                                                                                                                                                                                                                                   |                                |                             |                                         |         |                             |                                                                                                                                                                                                                                                                                                                                                                                                           |                                                                                                                                                                                                                                                                                                                                                                                                                                                             |      |

|                |                                                                                                                                                                       |                                                       |                                                                  |                      |       |                               |                                                                                                                                                                                                                              |                                                                                                                                                                                                                                                                                                                                                                       |    |
|----------------|-----------------------------------------------------------------------------------------------------------------------------------------------------------------------|-------------------------------------------------------|------------------------------------------------------------------|----------------------|-------|-------------------------------|------------------------------------------------------------------------------------------------------------------------------------------------------------------------------------------------------------------------------|-----------------------------------------------------------------------------------------------------------------------------------------------------------------------------------------------------------------------------------------------------------------------------------------------------------------------------------------------------------------------|----|
| Fatti, et al.  | The Effectiveness and Cost-Effectiveness of Community-Based Support for Adolescents Receiving Antiretroviral Treatment: An Operational Research Study in South Africa | <i>Journal of the International AIDS Society</i> 2018 | KwaZulu-Natal/Western Cape/Eastern Cape/Mpumalanga, South Africa | 6706 Adolescents     | 10-24 | Retrospective Cohort Study    | Community based support (CBS) included home-based ART-related education, psychosocial support, symptom screening for opportunistic infections and support to access government grants. CBS was compared to standard of care. | Cumulative LTFU was 40% lower amongst participants receiving CBS (29.9%) compared to participants without CBS (38.9%), aHR = 0.60 (95% CI: 0.51 to 0.71); p < 0.0001).<br><br>Viral failure: at 3 years – no difference; at five years 18.8% CBS participants versus 37.2% non-CBS participants had viral failure, adjusted odds ratio = 0.24 (95% CI: 0.06 to 1.03). | 80 |
| Zanoni, et al. | Higher Retention and Viral Suppression with Adolescent-Focused HIV Clinic in South Africa                                                                             | <i>PLoS One</i> 2017                                  | KwaZulu-Natal, South Africa                                      | 254 HIV+ Adolescents | 13-24 | Retrospective Cohort Analysis | Weekend adolescent-focused clinic with peer support, group activities, counseling, and meals compared to standard of care.                                                                                                   | Retention: 95% in adolescent-friendly clinic vs. 85% in standard clinic (OR 3.5; 95% CI 1.2 – 11.1; p=0.018).<br><br>Viral Suppression: 91% adolescent-friendly clinic vs. 80% in standard clinic. (OR 2.5; 95% CI 1.1 – 5.8; p=0.028)                                                                                                                                | 88 |
